# Supplementary material for: Disulfideptosis-associated lncRNAs reveal features of prognostic, immune escape, tumor mutation, and tumor malignant progression in renal clear cell carcinoma
Source: Aging (Albany NY). 2024 Feb 8;16(4):3280–301. doi: 10.18632/aging.205534 (PMC10929831; doi:10.18632/aging.205534)
Supplement: Supplementary Table 1 [file aging-16-205534-s002.pdf]

## SUPPLEMENTARY TABLE

**Supplementary Table 1. Results of t-test for clinical data of train and test sets.**

| Covariates    | Type      | Total        | Test         | Train        | P-value       |
|---------------|-----------|--------------|--------------|--------------|---------------|
| <b>Age</b>    | ≤65       | 349 (65.48%) | 177 (66.54%) | 172 (64.42%) | <b>0.6715</b> |
|               | >65       | 184 (34.52%) | 89 (33.46%)  | 95 (35.58%)  |               |
| <b>Gender</b> | Female    | 188 (35.27%) | 91 (34.21%)  | 97 (36.33%)  | <b>0.6735</b> |
|               | Male      | 345 (64.73%) | 175 (65.79%) | 170 (63.67%) |               |
| <b>Grade</b>  | G1        | 14 (2.63%)   | 7 (2.63%)    | 7 (2.62%)    | <b>0.4156</b> |
|               | G2        | 229 (42.96%) | 114 (42.86%) | 115 (43.07%) |               |
|               | G3        | 206 (38.65%) | 110 (41.35%) | 96 (35.96%)  |               |
|               | G4        | 76 (14.26%)  | 32 (12.03%)  | 44 (16.48%)  |               |
|               | Unknown   | 8 (1.5%)     | 3 (1.13%)    | 5 (1.87%)    |               |
| <b>Stage</b>  | Stage I   | 267 (50.09%) | 136 (51.13%) | 131 (49.06%) | <b>0.2856</b> |
|               | Stage II  | 57 (10.69%)  | 25 (9.4%)    | 32 (11.99%)  |               |
|               | Stage III | 123 (23.08%) | 68 (25.56%)  | 55 (20.6%)   |               |
|               | Stage IV  | 83 (15.57%)  | 36 (13.53%)  | 47 (17.6%)   |               |
|               | Unknown   | 3 (0.56%)    | 1 (0.38%)    | 2 (0.75%)    |               |
| <b>T</b>      | T1        | 273 (51.22%) | 138 (51.88%) | 135 (50.56%) | <b>0.9687</b> |
|               | T2        | 69 (12.95%)  | 33 (12.41%)  | 36 (13.48%)  |               |
|               | T3        | 180 (33.77%) | 90 (33.83%)  | 90 (33.71%)  |               |
|               | T4        | 11 (2.06%)   | 5 (1.88%)    | 6 (2.25%)    |               |
| <b>M</b>      | M0        | 422 (79.17%) | 214 (80.45%) | 208 (77.9%)  | <b>0.2588</b> |
|               | M1        | 79 (14.82%)  | 34 (12.78%)  | 45 (16.85%)  |               |
|               | Unknown   | 32 (6%)      | 18 (6.77%)   | 14 (5.24%)   |               |
| <b>N</b>      | N0        | 240 (45.03%) | 118 (44.36%) | 122 (45.69%) | <b>0.8718</b> |
|               | N1        | 16 (3%)      | 7 (2.63%)    | 9 (3.37%)    |               |
|               | Unknown   | 277 (51.97%) | 141 (53.01%) | 136 (50.94%) |               |
